# Supplementary material for: Novel poly(arylene ether ketone)/poly(ethylene glycol)-grafted poly(arylene ether ketone) composite microporous polymer electrolyte for electrical double-layer capacitors with efficient ionic transport
Source: Royal Society of Chemistry journal article supplement (doi:10.1039/d1ra01047f), 2021-01-01
Supplement: d1ra01047f1.pdf [file d1ra01047f1.pdf]

**1 Novel poly(arylene ether ketone) /poly(ethylene  
2 glycol)-grafted poly(arylene ether ketone) composite  
3 microporous polymer electrolyte for electrical double-  
4 layer capacitors with efficient ionic transport**

**5**

**6** Fangyuan Hu<sup>a,\*</sup>, Yiting Liu<sup>a</sup>, Wenlong Shao<sup>b</sup>, Tianpeng Zhang<sup>a</sup>, Siyang Liu<sup>a</sup>,  
**7** Dongming Liu<sup>a</sup>, Shouhai Zhang<sup>b</sup>, Xigao Jian<sup>a,b</sup>

**8**

**9** <sup>a</sup> School of Materials Science and Engineering, State Key Laboratory of Fine  
**10** Chemicals, Key Laboratory of Energy Materials and Devices (Liaoning Province),  
**11** Liaoning Province Engineering Centre of High Performance Resins. Dalian  
**12** University of Technology, Dalian, 116024, China.

**13** <sup>b</sup> State Key Laboratory of Fine Chemicals, Liaoning Province Engineering Research  
**14** Centre of High Performance Resins. Dalian University of Technology, Dalian,  
**15** 116024, China.

**16** \* Corresponding Author. E-mail: [hufangyuan@dlut.edu.cn](mailto:hufangyuan@dlut.edu.cn)(F. Hu).

**17**

**18**

## 1 Materials

2 4-(4-hydroxyl-phenyl)(2H)-phthalazine-1-one (DHPZ, 99%) was kindly offered by  
3 Dalian Polymer New Materials Co., Ltd. (Dalian, China). 4,4'-difluorobenzophenone  
4 (DFBP, 99%), diphenolic acid (DPA, 98%), carboxylated chitosan (BR, water soluble,  
5 degree of substitution  $\geq 60\%$ ), methoxypolyethylene glycol ( $M_n=1000\text{g mol}^{-1}$ , 99%),  
6 N,N'-dicyclohexylcarbodiimide (DCC, 99%), 4-dimethylaminopyridine (DMAP, 99%)  
7 were all purchased from Aladdin Industrial Co., Ltd. Activated carbon powder (surface  
8 area of  $1600\text{ m}^2\text{ g}^{-1}$ , porous volume of  $0.7\text{ mL g}^{-1}$ ) was provided by SCM Industrial  
9 Chemical Co. Ltd. Shanghai, China. Polytetrafluoroethylene (PTFE) (60 wt%  
10 dispersion), acetylene black (Specific surface area:  $58\text{ m}^2/\text{g}$ ), titanium mesh (100 mesh),  
11 lithium perchlorate (99.9%) were obtained from Guangdong Canrd New Energy  
12 Technology Co.,Ltd. Anhydrous tetrahydrofuran (THF, 99%), sulfolane (99%), toluene  
13 (99%), 1-methyl-2-pyrrolidinone (NMP, 99%), isopropanol (99%), concentrated HCl  
14 (99%) and anhydrous potassium carbonate ( $\text{K}_2\text{CO}_3$ , 99%) were all obtained from  
15 Beijing Chemical Reagent Company. Commercial separator (model: NKK-MPF30AC-  
16 100, thickness of 90–100 mm) were obtained from Saibo Electrochemical reagent  
17 company.

(a)

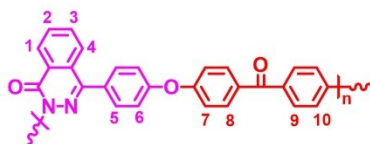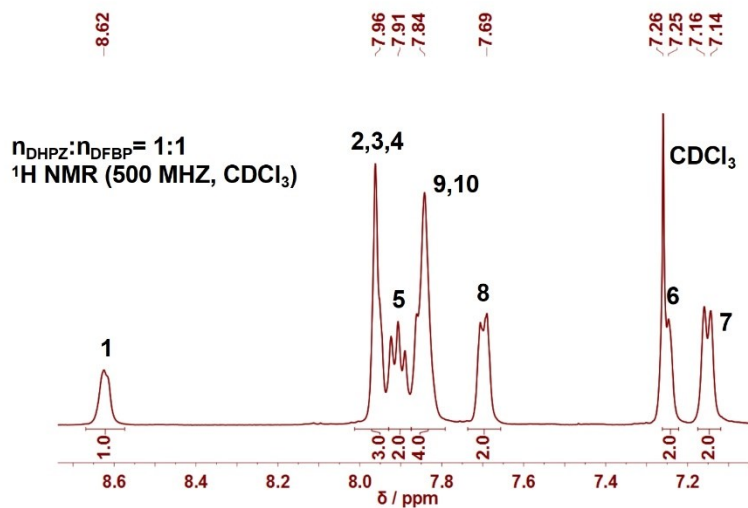

(b)

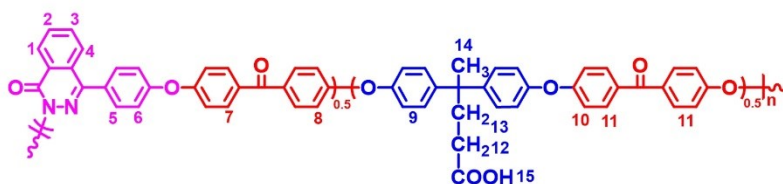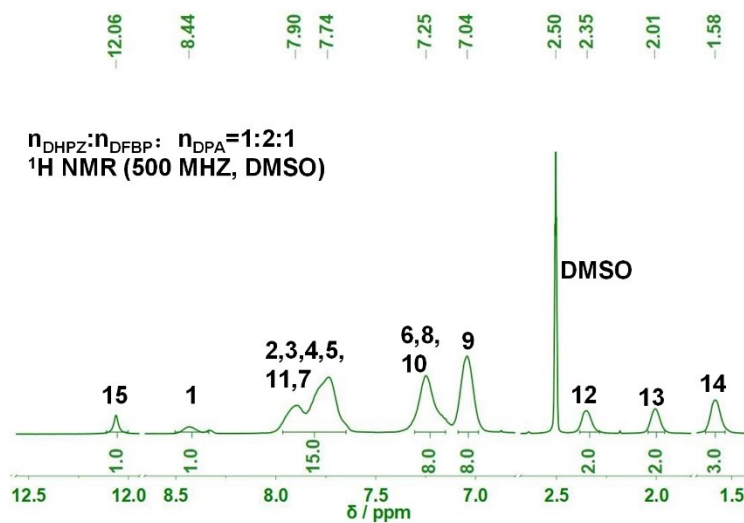

1

2

3

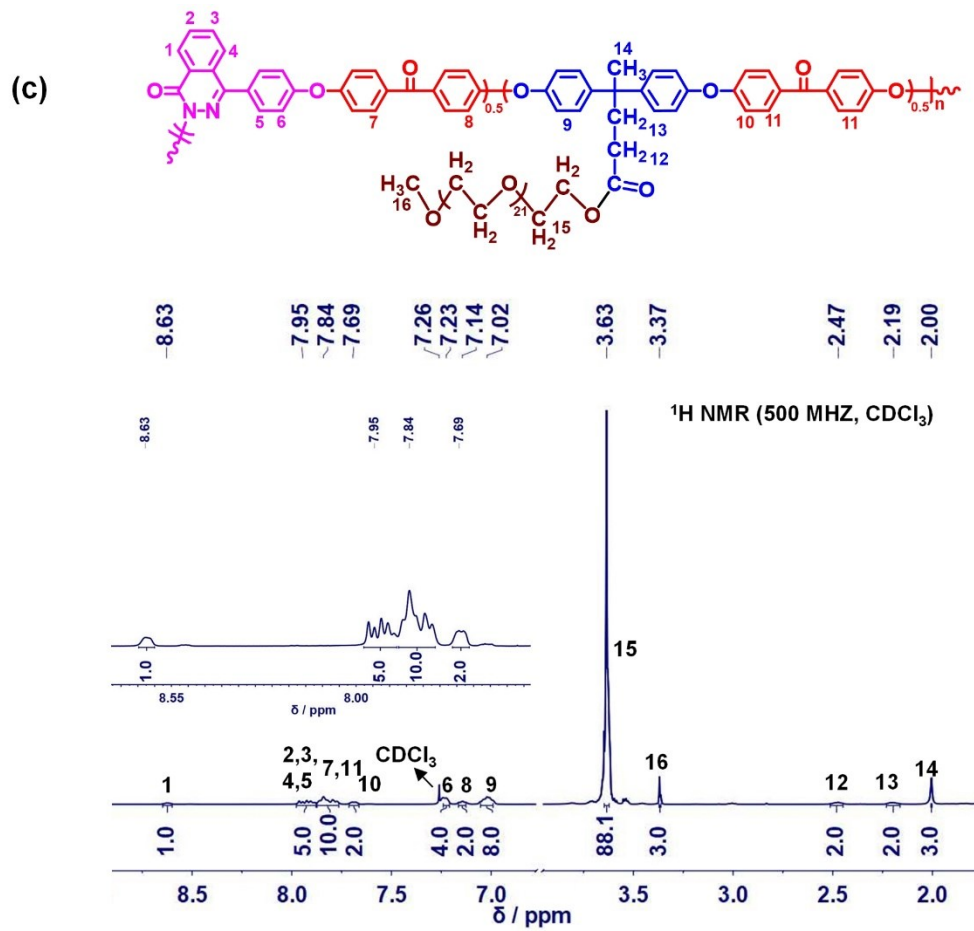

1

2 Fig. S1.  $^1\text{H NMR}$  spectra of (a) PAEK, (b) PAEK-COOH, and (c) PAEK-g-PEG  
 3 copolymers.

4

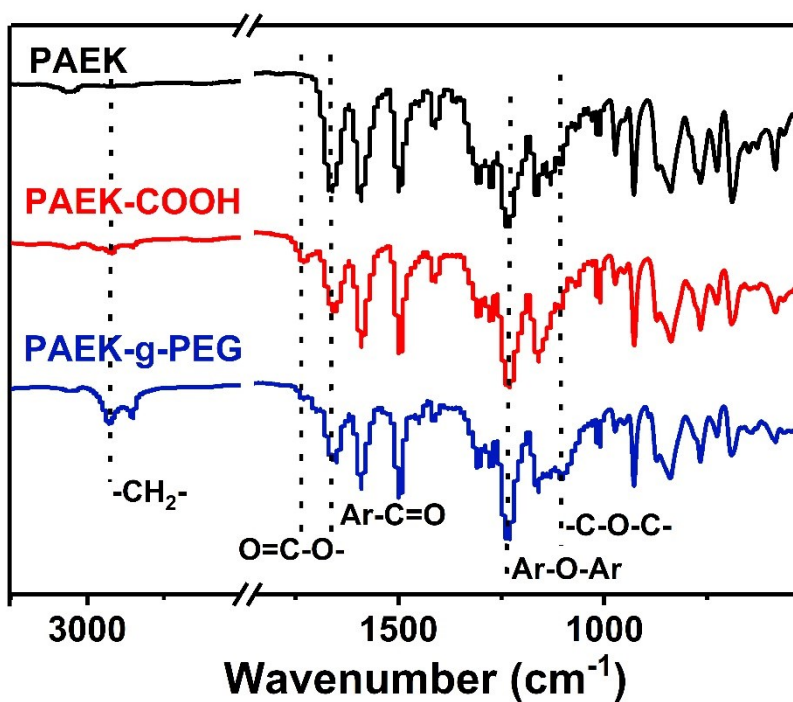

2 **Fig. S2.** FTIR spectra of (a) PAEK, (b) PAEK-COOH, and (c) PAEK-g-PEG  
 3 copolymers.

4  
 5 **Tab. S1.** Thermal weight loss temperature of PAEK and PAEK-g-PEG

| Thermal weight loss temperature | PAEK | PAEK-g-PEG |
|---------------------------------|------|------------|
| The first step (°C)             | 475  | 175        |
| The second step (°C)            | /    | 375        |

6  
 7

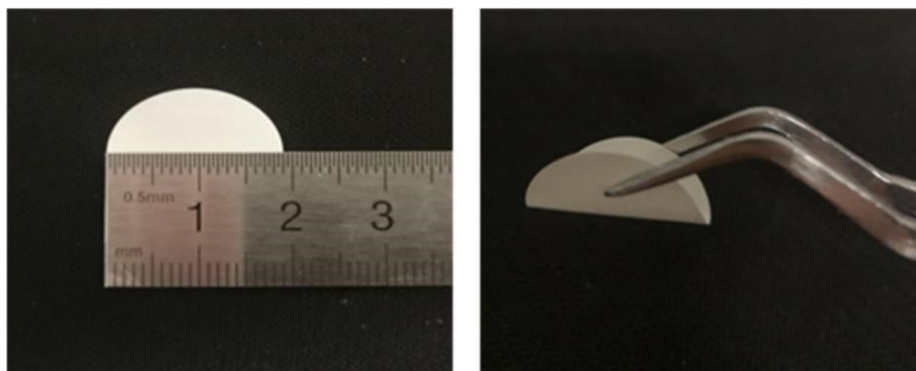

8

9

**Fig. S3.** The digital photos of composite microporous polymer electrolyte S3.

10

1

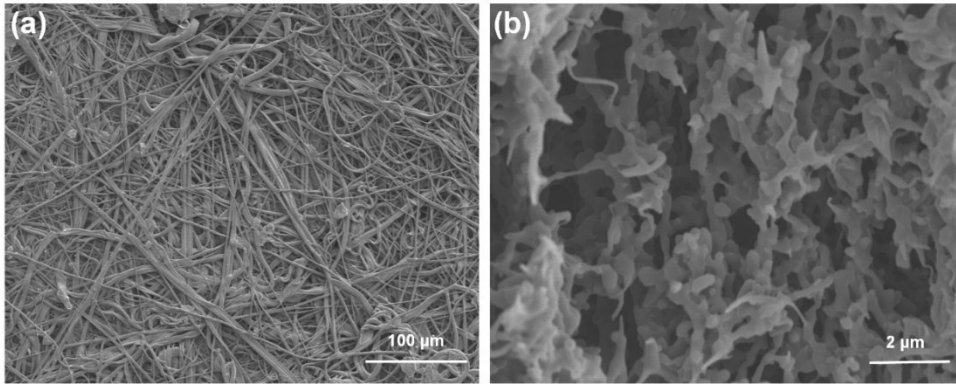

2

3 **Fig. S4.** (a) Surface morphology of the commercial separator CS. (b) Cross-section  
4 image of fabricated micro-porous membranes S3.

4

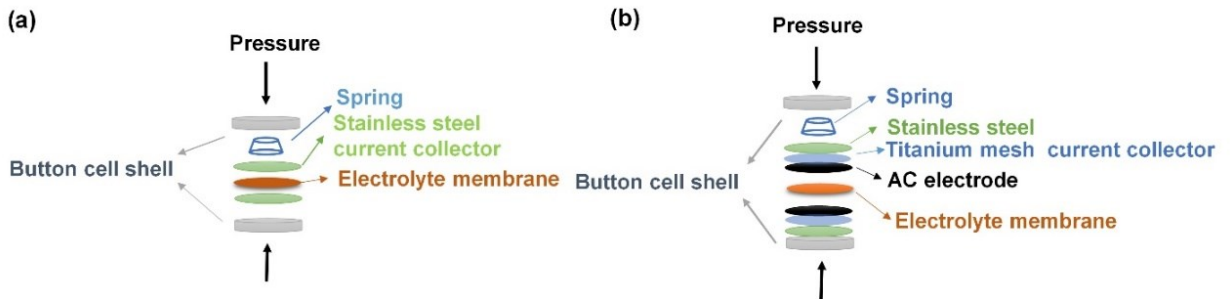

5

6 **Fig. S5.** (a) the assembly schematic for the bulk impedance and (b) interface  
7 impedance of solid electrolyte membrane.

8

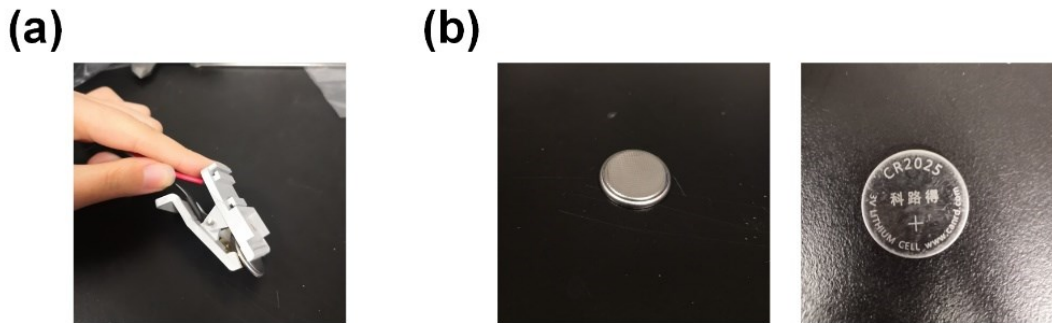

9

10 **Fig. S6.** (a) The digital photos of two-point test and (b) assembly device using 2025-  
11 type button cell.

12

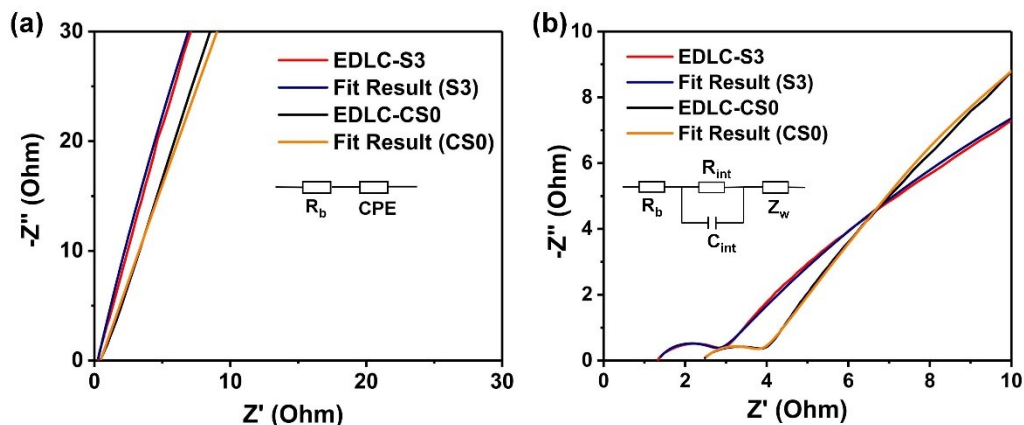

1

2 **Fig. S7.** (a) EIS Nyquist plot and fit figure for the frequency range of 100 kHz to 1 Hz  
 3 at 293 K. (a, inset) Equivalent circuit model to extrapolate  $R_b$  ( $R_b$  - the bulk electrolyte  
 4 membrane, CPE - the constant phase element, the fitting error on  $R_b$  is less than 5%)  
 5 and (b) EIS Nyquist plot and fit figure for the frequency range of 0.01 Hz–100 kHz. (b,  
 6 inset) Equivalent circuit model to extrapolate  $R_{int}$  ( $R_{int}$ - the interface impedance,  $C_{int}$  –  
 7 the interface capacitance,  $Z_w$ – the Warburg impedance element, the fitting error on  $R_{int}$   
 8 are less than 5%).

9

10 **Tab. S2.** Specific capacitance  $C_s$ , energy density  $E_{cell}$ , and power density  $P_{cell}$  of  
 11 EDLC-S3 and EDLC-CS0 at different current densities (0.2–5 A g<sup>-1</sup>)

| Current<br>density<br>(A g <sup>-1</sup> ) | $C_s$ -S3<br>(F g <sup>-1</sup> ) | $C_s$ -CS0<br>(F g <sup>-1</sup> ) | $E_{cell}$ -S3<br>(Wh kg <sup>-1</sup> ) | $E_{cell}$ -CS0<br>(Wh kg <sup>-1</sup> ) | $P_{cell}$ -S3<br>(W kg <sup>-1</sup> ) | $P_{cell}$ -CS0<br>(W kg <sup>-1</sup> ) |
|--------------------------------------------|-----------------------------------|------------------------------------|------------------------------------------|-------------------------------------------|-----------------------------------------|------------------------------------------|
| 0.2                                        | 134.38                            | 126.92                             | 10.47                                    | 9.90                                      | 20.92                                   | 20.82                                    |
| 0.5                                        | 133.70                            | 125.38                             | 10.38                                    | 9.74                                      | 51.91                                   | 51.94                                    |
| 1                                          | 122.61                            | 112.11                             | 9.43                                     | 8.64                                      | 103.34                                  | 103.47                                   |
| 2                                          | 108.96                            | 101.73                             | 8.22                                     | 7.72                                      | 204.73                                  | 205.27                                   |
| 5                                          | 90.92                             | 78.27                              | 6.37                                     | 5.50                                      | 493.08                                  | 493.75                                   |

12
